# Supplementary material for: Tumor-specific memory CD8+ T cells are strictly resident in draining lymph nodes during tumorigenesis
Source: PubMed Central journal article supplement (PMC10066293; doi:10.1038/s41423-023-00986-2), 2023-03-01

**a**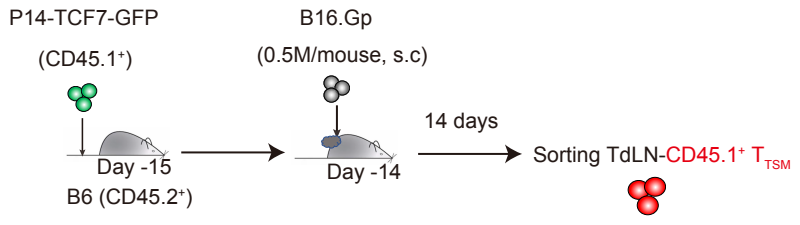**b**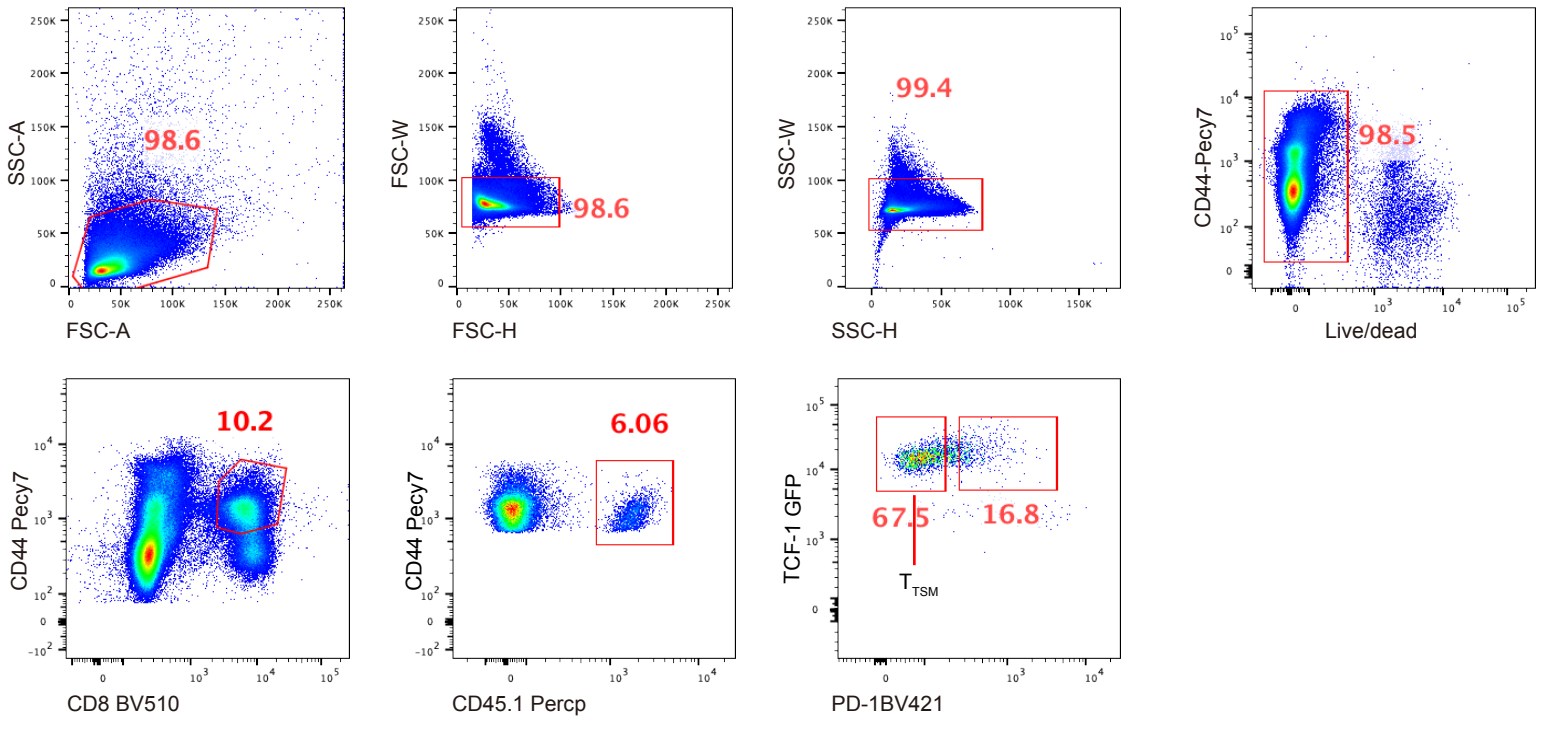**c**

(Gated on CD8<sup>+</sup>CD44<sup>+</sup>CD45.1<sup>+</sup> T cells)

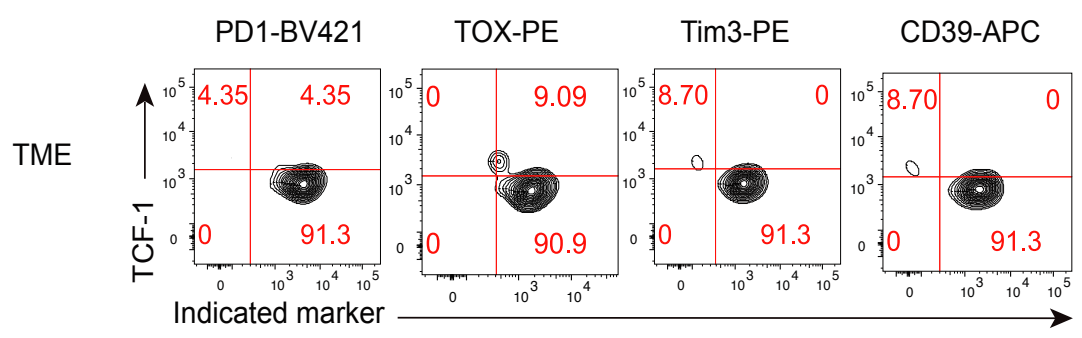

Supplement: 41423_2023_986_MOESM3_ESM.pdf [file 41423_2023_986_MOESM3_ESM.pdf]
